# Supplementary material for: Transcriptome Kinetics Is Governed by a Genome-Wide Coupling of mRNA Production and Degradation: A Role for RNA Pol II
Source: PLoS Genet. 2011 Sep 8;7(9):e1002273. doi: 10.1371/journal.pgen.1002273 (PMC3169527; doi:10.1371/journal.pgen.1002273)
Supplement: Table S1 — GO enrichment analysis for clusters in Figure 3. GO categories which passed hyper geometric test with FDR (q = 0.05) for the three clusters in Figure 3. (XLS) [file pgen.1002273.s006.xls]

## Sheet: Sheet1
	GO analysis for clustering in figure 3, all categories passed FDR with q value of 0.05
Cluster 1	categories	# group	# gene set	# intersection	p-value
	energy reserve metabolism	296	36	14	8.31819e-10
	generation of precursor metabolites and energy	296	230	35	3.31341e-09
	carbohydrate metabolism	296	200	31	1.80432e-08
	oxidoreductase activity	296	254	35	4.62192e-08
	biological process unknown	296	1449	112	3.52175e-07
	trehalose metabolism	296	7	5	6.4849e-06
	glycogen metabolism	296	29	9	8.47582e-06
	glucan metabolism	296	40	10	2.23766e-05
	carbohydrate biosynthesis	296	67	13	2.58765e-05
	carbohydrate catabolism	296	52	11	4.71961e-05
	glucosyltransferase activity	296	15	6	5.7071e-05
	disaccharide metabolism	296	10	5	6.84764e-05
	sulfur utilization	296	10	5	6.84764e-05
	peroxidase activity	296	17	6	0.000129355
	UDP-glycosyltransferase activity	296	24	7	0.000137643
	pyridoxine metabolism	296	8	4	0.000396301
	siderophore transporter activity	296	4	3	0.000507652
	protease inhibitor activity	296	4	3	0.000507652
	trehalose biosynthesis	296	4	3	0.000507652
Cluster 2	response to chemical stimulus	168	232	25	8.47937e-09
	response to abiotic stimulus	168	305	26	5.0813e-07
	response to oxidative stress	168	53	9	1.72569e-05
	response to inorganic substance	168	21	6	2.05021e-05
	oxidoreductase activity	168	254	20	3.84052e-05
	response to drug	168	38	7	8.96508e-05
	iron ion homeostasis	168	30	6	0.000180607
	aldehyde metabolism	168	20	5	0.000209894
cluster 3	ribosome biogenesis	359	210	107	2.51606e-77
	nucleolus	359	223	106	1.82888e-72
	rRNA metabolism	359	172	82	2.24915e-55
	nuclear lumen	359	517	118	8.93346e-41
	RNA processing	359	332	81	2.51421e-29
	organelle lumen	359	719	123	3.10446e-29
	RNA metabolism	359	461	96	4.326e-29
	35S primary transcript processing	359	74	35	1.7039e-23
	nuclear part	359	897	126	1.10875e-21
	processing of 20S pre-rRNA	359	43	26	2.49827e-21
	nucleolar part	359	98	36	1.29717e-19
	non-membrane-bound organelle	359	854	117	5.06368e-19
	snoRNA binding	359	26	19	3.04273e-18
	small nucleolar ribonucleoprotein complex	359	57	25	4.13315e-16
	ribosomal large subunit biogenesis	359	21	14	7.48585e-13
	ribosome assembly	359	62	22	4.92044e-12
	ribosomal large subunit assembly and maintenance	359	40	16	5.4052e-10
	RNA binding	359	226	38	9.04757e-09
	RNA helicase activity	359	41	14	7.22856e-08
	rRNA binding	359	11	7	8.77861e-07
	RNA-dependent ATPase activity	359	26	10	1.59411e-06
	ribosome export from nucleus	359	21	9	1.83562e-06
	protein complex assembly	359	147	25	2.86606e-06
	RNA methyltransferase activity	359	23	9	4.56597e-06
	RNA modification	359	56	14	5.06177e-06
	methyltransferase activity	359	82	17	7.85393e-06
	tRNA methyltransferase activity	359	15	7	1.37687e-05
	S-adenosylmethionine-dependent methyltransferase activity	359	62	14	1.8022e-05
	biopolymer metabolism	359	1457	124	2.53212e-05
	ATP-dependent helicase activity	359	42	11	3.30953e-05
	RNA methylation	359	17	7	3.73297e-05
	ribosomal large subunit export from nucleus	359	8	5	4.25203e-05
	cyclin-dependent protein kinase regulator activity	359	23	8	4.31265e-05
	small subunit processome	359	5	4	6.88918e-05
	90S preribosome	359	5	4	6.88918e-05
	helicase activity	359	90	16	0.000105551
	regulation of cyclin-dependent protein kinase activity	359	14	6	0.000106279
	snoRNA metabolism	359	15	6	0.000167952
	preribosome	359	10	5	0.000172435
	processing of 27S pre-rRNA	359	11	5	0.000300141
	rRNA modification	359	17	6	0.00037344
	tRNA (guanine) methyltransferase activity	359	7	4	0.000436246
	nucleolar preribosome	359	8	4	0.000829971
	spermine transporter activity	359	4	3	0.000899607
	DNA-directed RNA polymerase I complex	359	14	5	0.00111361
	nucleic acid binding	359	474	46	0.0012321
